# Supplementary material
Source: PubMed Central journal article supplement (PMC1383692)
Supplement: bj3930331add.pdf [file bj3930331add.pdf]

## Supplementary Material to:

### Carbohydrate specificity of an insecticidal lectin isolated from the leaves of *Glechoma hederacea* towards mammalian glycoconjugates

BY Tanuja Singh, June H. Wu, Willy J. Peumans, Pierre Rougé, Els J.M. Van Damme, Richard A. Alvarez, Ola Blixt and Albert M. Wu

#### Supplementary Materials and Method:

##### Glycoproteins and polysaccharides

Hamster submaxillary glycoprotein (gp), one of the simplest gps among mammalian salivary mucins containing NeuAc-GalNAc (sialyl-**Tn**) and GalNAc $\alpha$ 1-Ser/Thr (**Tn**) residues as carbohydrate side chains, was obtained by a modification of the methods previously described [45]. About two-thirds of the carbohydrate side chains of armadillo submandibular gland mucin (ASG-A) is GalNAc $\alpha$ 1-Ser/Thr (**Tn**) and one third is Neu5Ac $\alpha$ 2-6GalNAc $\alpha$ 1-O-Ser/Thr (sialyl **Tn**) [48,49]. Native ASG-**Tn** [46], a salivary glycoprotein of nine-banded armadillo (*Dasypus novemcinctus mexicanus*) containing only **Tn** as carbohydrate side chains, was isolated from the 0.01 M PBS, pH 6.8 gland extract after removal of ASG-A, which is one of the sialoglycoproteins in armadillo glands [48].

**Tn** and sialyl-**Tn** containing ovine (OSM), bovine (BSM), and porcine (PSM) submandibular/salivary mucins (glycoproteins) were purified according to the method described earlier by Tettamanti and Pigman [50] with some modifications [48]. About 75% of the carbohydrate side chains of asialo OSM were GalNAc $\alpha$ 1-Ser/Thr (**Tn**). Asialo PSM contains Gal $\beta$ 1-3GalNAc $\alpha$ 1-Ser/Thr (**T $\alpha$** ) [47] together with **Tn** and **A** (GalNAc $\alpha$ 1-3Gal, human blood group A-specific disaccharide) sequences, as most of the outer fucosyl residues are cleaved by the mild acid hydrolysis.

The active (M.W.  $10.5 \times 10^3$ - $21.0 \times 10^3$ ) and inactive (M.W.  $2.6 \times 10^3$ - $3.8 \times 10^3$ ) anti-freeze gp from the Antarctic fish (*Trematomus borchgrevinki*), which contains exclusively Gal $\beta$ 1-3GalNAc $\alpha$ 1- (**T $\alpha$** ) as carbohydrate chains [51], was provided by Dr. R.E. Freney (Department of Food Science and Technology, University of California, Davis, CA, USA) through the late Dr. E.A. Kabat (Columbia Medical Center, New York, USA).

Glycophorin A, a sialyl  $T_{\alpha}$ -containing glycoprotein, was prepared from the membranes of old human blood group O erythrocytes by phenol/saline extraction and was purified by gel filtration in the presence of SDS [52]. The **Tn**-glycophorin was obtained by removing the terminal galactose residues from asialo-glycophorin by periodate oxidation and mild acid hydrolysis [20].

Human  $\alpha_1$ -acid glycoprotein (Sigma) contains tetra-, tri- and di-antennary complex type glycans in the ratio of 2:2:1 [53,54]. Fetuin (Gibco Laboratories, Grand Island, NY, USA), which is the major glycoprotein in fetal calf serum and has six oligosaccharide side chains per molecule, three *O*-glycosidically-linked to Ser/Thr and three *N*-glycosidically-linked to Asn [55] that contains tri- and di-antennary complex type glycans in the ratio of 1:2 [56].

ABH blood group active glycoproteins (Cyst Beach, MSS, Tighe, Mcdon and JS phenol insoluble) were prepared from human ovarian cyst fluid [42,57-60].

Desialylation of sialoglycoproteins was performed by mild acid hydrolysis in 0.01 N HCl at 80°C for 90 min and dialyzed against distilled H<sub>2</sub>O for 2 days to remove small fragments [50].

The human blood group P<sub>1</sub>-active substance, purified from sheep hydatid cyst glycoprotein, was kindly provided by late Dr. W.M. Watkins (Imperial College School of Medicine, Hammersmith Hospital London, UK) [61].

The *Pneumococcus* type 14 polysaccharide, isolated from *Streptococcus pneumoniae* capsule [62], was a gift from the late Dr. E.A. Kabat. Mannan from *Saccharomyces cerevisiae* was purchased from Sigma.

### **Lectinochemical assays**

The assay was performed according to the procedures described by Duk et al. [20]. The volume of each reagent applied to the plate was 50  $\mu$ l/well, and all incubations, except for coating, were performed at 20°C. The reagents, if not indicated otherwise, were diluted with Tris HCl buffered saline containing 0.05% Tween 20 (TBS-T). The TBS buffer or 0.15 M NaCl containing 0.05% Tween 20 were used for washing the plates between incubations.

The 96-well microtiter plates (Nunc, Maxisorp, Vienna, Austria) were coated with glycoproteins at the amount of 5 to less than 0.07 ng (see Figure 1a of manuscript), and

500 to less than 10 ng per well (see Figures 1c and 1d of manuscript) in 0.05 M carbonate buffer, pH 9.6, overnight at 4°C. After washing the plate, biotinylated lectins were added and incubated for 30 min. The plates were washed to remove unabsorbed lectin and the ExtrAvidin/alkaline phosphatase solution (Sigma, diluted 1:10,000) was added. After 1h the plates were washed at least four times and incubated with *p*-nitrophenyl phosphate (Sigma 104 phosphatase substrate 5 mg tablets) in 0.05 M carbonate buffer, pH 9.6, containing 1 mM MgCl<sub>2</sub> (1 tablet/5 ml). The absorbance was read at 405 nm in a microtiter plate reader, after 2h incubation with the substrate.

For inhibition studies, serially diluted inhibitor samples were mixed with an equal volume of lectin solution containing a fixed amount of lectin. The control lectin sample was diluted two-fold with TBS-T. After 30 min incubation at 20°C, samples were tested in the binding assay, as described above. The inhibitory activity was estimated from the inhibition curve and is expressed as the amount of inhibitor (ng or nmole/well) giving 50% inhibition of the control lectin binding.

All experiments were done in duplicate or triplicate, and data are presented as the mean value of the results. The standard deviation did not exceed 10% and in most experiments was less than 5% of the mean value. For the binding experiment, the control wells, where coating or addition of biotinylated lectin was omitted, gave low absorbance values (below 0.1). It showed that blocking the wells before lectin addition was not necessary when Tween 20 was present in the TBS. On the other hand, for the inhibition experiment, two controls were set up. The first control was treated under exactly the same condition as the experimental group except that the inhibitor was left out; the absorbance value was recorded at 2h was between 2.8-3.3. For the second control (coating only or negative control), both lectin and inhibitors were left out while other conditions were kept the same as in the experimental group, and the absorbance value of this control was below 0.1, which was used as the background value.

### **Supplementary References:**

48. Wu, A.M. and Pigman, W. (1977) Preparation and characterization of armadillo submandibular glycoproteins. *Biochem. J.* **161**, 37-47

49. Wu, A.M., Slomiany, A., Herp, A. and Slomiany, B.L. (1979) Structural studies on the carbohydrate units of armadillo submandibular glycoprotein. *Biochim. Biophys. Acta* **578**, 297-304
50. Tettamanti, G. and Pigman, W. (1968) Purification and characterization of bovine and ovine submaxillary mucins. *Arch. Biochem. Biophys.* **124**, 41-50
51. DeVries, A.L., Komatsu, S.K. and Feeney, R.E. (1970) Chemical and physical properties of freezing point-depressing glycoproteins from Antarctic fishes. *J. Biol. Chem.* **245**, 2901-2908
52. Lisowska, E., Messeter, L., Duk, M., Czerwinski, M. and Lundblad, A. (1987) A monoclonal anti-glycophorin A antibody recognizing the blood group M determinant: studies on the subspecificity. *Mol. Immunol.* **24**, 605-613
53. Fournet, B., Montreuil, J., Strecker, G., Dorland, L., Haverkamp, J., Vliegthart, J.F.G., Binette, J.P. and Schmid, K. (1978) Determination of the primary structures of 16 asialo-carbohydrate units derived from human plasma alpha 1-acid glycoprotein by 360-MHZ <sup>1</sup>H NMR spectroscopy and permethylation analysis. *Biochemistry* **17**, 5206-5214
54. Fournier, T., Medjoubi-N. N. and Porquet, D. (2000) Alpha-1-acid glycoprotein. *Biochim. Biophys. Acta* **1482**, 157-171
55. Nilsson, B., Norden, N.E. and Svensson, S. (1979) Structural studies on the carbohydrate portion of fetuin. *J. Biol. Chem.* **254**, 4545-4553
56. Meinjohanns, E., Meldal, M., Paulsen, H., Dwek, R.A. and Bock, K. (1998) Novel sequential solid-phase synthesis of N-linked glycopeptides from natural sources. *J. Chem. Soc. Perkin Trans.* **1**, 549-560
57. Kabat, E.A. (1956) Blood Group Substances. Their Chemistry and Immunochemistry. pp. 135-139, Academic Press, New York
58. Wu, A.M. (1988) Structural concepts of the human blood group A, B, H, Le(a), Le(b), I and i active glycoproteins purified from human ovarian cyst fluid. *Adv. Exp. Med. Biol.* **228**, 351-394
59. Kabat, E.A., Baer, H., Bezer, A.E. and Knaub, V. (1948) Immunochemical studies on blood groups VII. Chemical changes associated with destruction of blood group activity and enhancement of the type XIV cross reactivity by partial hydrolysis of hog and human blood group A, B, and O substances. *J. Exp. Med.* **88**, 43-57

60. Wu, A.M., Kabat, E.A., Pereira, M.E.A., Gruezo, F.G. and Liao, J. (1982) Immunochemical studies on blood groups: The internal structure and immunological properties of water-soluble human blood group A substance studied by Smith degradation, liberation, and fractionation of oligosaccharides and reaction with lectins. *Arch. Biochem. Biophys.* **215**, 390-404
61. Wu, A.M., Song, S.-C., Wu, J.H., Pfüller, U., Chow, L.-P. and Lin, J.-Y. (1995) A sheep hydatid cyst glycoprotein as receptors for three toxic lectins, as well as *Abrus precatorious* and *Ricinus communis* agglutinins. *Biochim. Biophys. Acta* **1243**, 124-128
62. Lindberg, B., Lönngren, J. and Powell, D.A. (1977) Structural studies on the specific type-14 pneumococcal polysaccharide. *Carbohydr. Res.* **58**, 177-186
63. Kabat, E.A. (1988) Antibody combining sites: how much of the antibody repertoire are we seeing? How does it influence our understanding of the structural and genetic basis of antibody complementarity? *Adv. Exp. Med. Biol.* **228**, 1-45

**Supplementary Figure 1. Results from the Gleheda-glycan binding array analysis.** A total of 190 glycans were screened for binding along with positive and negative controls, as described under “Experimental”.

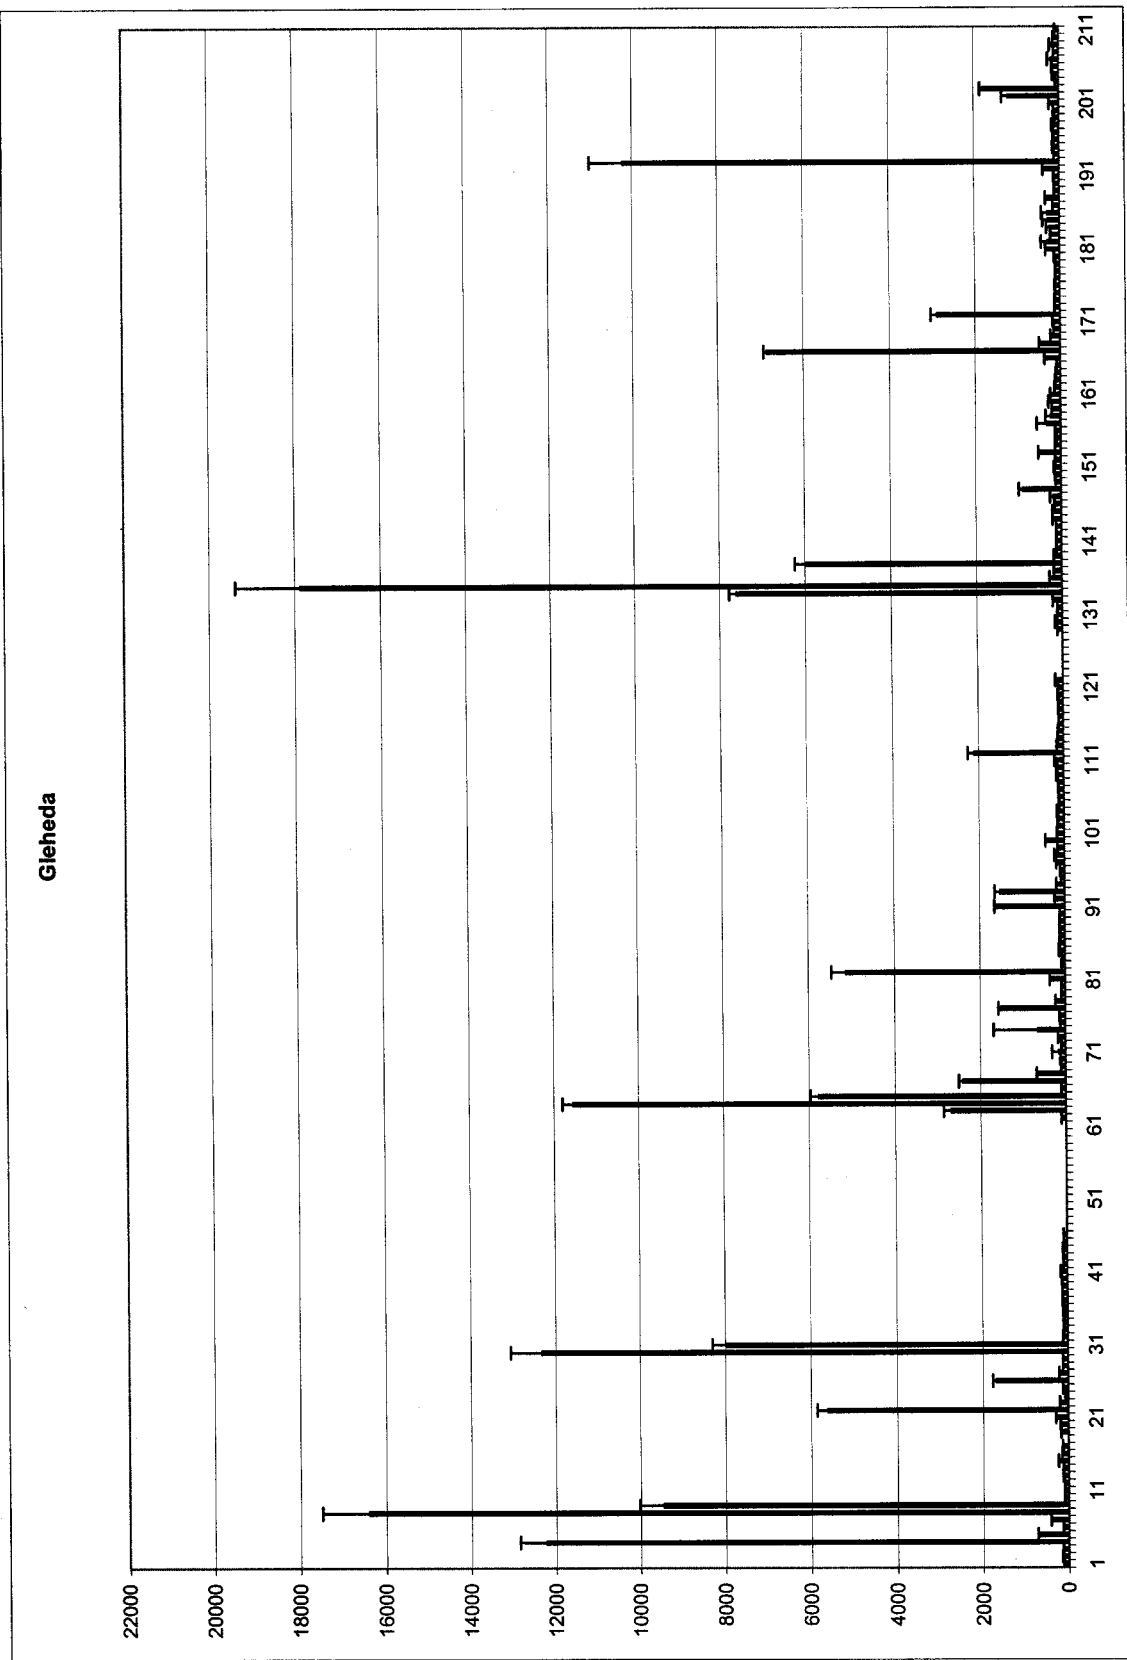

Glycan No.

Fig. 1

**Supplementary Table 1. Comparison of the binding properties of two Tn specific lectins, recognizing GalNAc $\alpha$ / $\beta$ 1 $\rightarrow$  glycotopes**

| # | Carbohydrate specificity                                                                                                                                                                                                                                                                                                                                                                                                                                                                                                                                                                                                     | Lectins                                                                                                                                                                                                                                                                                                                                                                                                                                                                                                                                                                                                                    |                                                                                                                                                                                                                                                                                                                                                                                                                                                                                                                                                                                                                                                                                                                                      |
|---|------------------------------------------------------------------------------------------------------------------------------------------------------------------------------------------------------------------------------------------------------------------------------------------------------------------------------------------------------------------------------------------------------------------------------------------------------------------------------------------------------------------------------------------------------------------------------------------------------------------------------|----------------------------------------------------------------------------------------------------------------------------------------------------------------------------------------------------------------------------------------------------------------------------------------------------------------------------------------------------------------------------------------------------------------------------------------------------------------------------------------------------------------------------------------------------------------------------------------------------------------------------|--------------------------------------------------------------------------------------------------------------------------------------------------------------------------------------------------------------------------------------------------------------------------------------------------------------------------------------------------------------------------------------------------------------------------------------------------------------------------------------------------------------------------------------------------------------------------------------------------------------------------------------------------------------------------------------------------------------------------------------|
|   |                                                                                                                                                                                                                                                                                                                                                                                                                                                                                                                                                                                                                              | Glehedra                                                                                                                                                                                                                                                                                                                                                                                                                                                                                                                                                                                                                   | SSL*                                                                                                                                                                                                                                                                                                                                                                                                                                                                                                                                                                                                                                                                                                                                 |
| 1 | Monosaccharide and submolecular specificity                                                                                                                                                                                                                                                                                                                                                                                                                                                                                                                                                                                  | $\alpha$ - and $\beta$ - anomer of Gal and enhanced by <i>N</i> -acetyl group at carbon-2 (GalNAc $\alpha$ 1 $\rightarrow$ ) strongly                                                                                                                                                                                                                                                                                                                                                                                                                                                                                      | $\alpha$ - and $\beta$ - anomer of GalNAc; <i>N</i> -acetyl group at carbon-2 and configuration of carbon-3 in GalNAc                                                                                                                                                                                                                                                                                                                                                                                                                                                                                                                                                                                                                |
| 2 | a) Ratio of $\alpha$ and $\beta$ anomer for <i>p</i> -nitrophenyl GalNAc glycosides <sup>††</sup><br>b) Ratio of $\alpha$ and $\beta$ anomer for <i>p</i> -nitrophenyl Gal glycosides <sup>††</sup><br>c) Ratio of $\alpha$ and $\beta$ anomer for methyl GalNAc glycosides <sup>††</sup><br>d) Ratio of $\alpha$ and $\beta$ anomer for methyl Gal glycosides <sup>††</sup><br>e) Hydrophobicity for GalNAc $\alpha$ -anomer <sup>†</sup><br>f) Hydrophobicity for Gal $\alpha$ -anomer <sup>†</sup><br>g) Hydrophobicity for GalNAc $\beta$ -anomer <sup>†</sup><br>h) Hydrophobicity for Gal $\beta$ -anomer <sup>†</sup> | 1.3 ( $\alpha \geq \beta$ ; curve 21 vs. 22)<br>1.4 ( $\alpha \geq \beta$ ; curve 26 vs. 27)<br>11.2 ( $\alpha > \beta$ ; curve 20 vs. 24)<br>17.3 ( $\alpha > \beta$ ; curve 25 vs. 29)<br>No (0.6; Ratio of curve 21 / curve 20)<br>No (1.0; Ratio of curve 26 / curve 25)<br>Yes (5.6; Ratio of curve 22 / curve 24)<br>Yes (12.6; Ratio of curve 27 / curve 29)                                                                                                                                                                                                                                                        | 1.7 ( $\alpha \leq \beta$ ; curve 1 vs. 2)<br>1.2 ( $\alpha \leq \beta$ ; curve 6 vs. 7)<br>4.3 ( $\alpha > \beta$ ; curve 3 vs. 5)<br>3.0 ( $\alpha > \beta$ ; curve 8 vs. 14)<br>No (1; Ratio of curve 2 / curve 3)<br>Yes (12.3; Ratio of curve 7 / curve 8)<br>Yes (7.4; Ratio of curve 1 / curve 5)<br>Yes (44.4; Ratio of curve 6 / curve 14)                                                                                                                                                                                                                                                                                                                                                                                  |
| 3 | Reactivity toward mammalian structural units expressed in decreasing order (based on nanomoles comparison)                                                                                                                                                                                                                                                                                                                                                                                                                                                                                                                   | GalNAc $\alpha$ 1-Ser/Thr ( <b>Tn</b> ) > GalNAc $\alpha$ 1-3Gal $\beta$ 1-4Glc ( <b>A<sub>L</sub></b> ) $\geq$ GalNAc $\alpha$ 1-3Gal ( <b>A</b> ) > GalNAc $\alpha$ 1-3( $\mu$ Fuc $\alpha$ 1-2)Gal ( <b>A<sub>h</sub></b> ) > Gal $\alpha$ 1-3Gal ( <b>B</b> ) $\geq$ GalNAc $\alpha$ 1-3GalNAc ( <b>F</b> ) $\geq$ GalNAc $\beta$ 1-4Gal ( <b>S</b> ) $\geq$ GalNAc $\beta$ 1-3Gal ( <b>P</b> ) > Gal $\alpha$ 1-4Gal ( <b>E</b> ) $\gg$ Gal $\beta$ 1-4Glc ( <b>L</b> ); while Gal $\beta$ 1-3GalNAc ( <b>T</b> ), Gal $\beta$ 1-3GlcNAc ( <b>I</b> ) and Gal $\beta$ 1-4GlcNAc ( <b>II</b> ) were inactive (Table 3) | GalNAc $\alpha$ 1-3GalNAc $\beta$ 1-3Gal $\alpha$ 1-4Gal $\beta$ 1-4Glc ( <b>Fp</b> ) $\geq$ GalNAc $\alpha$ 1-3Gal $\beta$ 1-4Glc ( <b>A<sub>L</sub></b> ) > GalNAc $\alpha$ 1-3GalNAc $\beta$ 1-Me ( <b>F<sub>β</sub></b> ) $\geq$ GalNAc $\alpha$ 1-3GalNAc $\alpha$ 1-Me ( <b>F<sub>α</sub></b> ) > GalNAc $\alpha$ 1-Ser/Thr ( <b>Tn</b> ) $\geq$ GalNAc $\alpha$ 1-3Gal ( <b>A</b> ) > GalNAc $\alpha$ 1-3GalNAc ( <b>F</b> ) $\geq$ GalNAc $\beta$ 1-4Gal ( <b>S</b> ) > GalNAc $\beta$ 1-3Gal ( <b>P</b> ); while Gal $\beta$ 1-4GlcNAc ( <b>II</b> ), Gal $\beta$ 1-3GlcNAc ( <b>I</b> ), Gal $\beta$ 1-3GalNAc ( <b>T</b> ), Gal $\alpha$ 1-4Gal ( <b>E</b> ) and Gal $\alpha$ 1-3Gal ( <b>B</b> ) were inactive (Table 2) |
| 4 | The most active monomeric ligands                                                                                                                                                                                                                                                                                                                                                                                                                                                                                                                                                                                            | GalNAc $\alpha$ 1-Ser/Thr ( <b>Tn</b> ) mainly                                                                                                                                                                                                                                                                                                                                                                                                                                                                                                                                                                             | GalNAc $\alpha$ 1-3GalNAc $\beta$ 1-3Gal $\alpha$ 1-4Gal $\beta$ 1-4Glc ( <b>Fp</b> ), GalNAc $\alpha$ 1-3Gal $\beta$ 1-4Glc ( <b>A<sub>L</sub></b> ), GalNAc $\alpha$ 1-3GalNAc $\beta$ 1-Me ( <b>F<sub>β</sub></b> ) and GalNAc $\alpha$ 1-Ser/Thr ( <b>Tn</b> )                                                                                                                                                                                                                                                                                                                                                                                                                                                                   |
| 5 | Ratio of glycotope clusters (simple multivalent form) / monomeric <b>Tn</b>                                                                                                                                                                                                                                                                                                                                                                                                                                                                                                                                                  | <b>Tn</b> -glycopeptides from asialo ovine submandibular glycoprotein (M.W. <3,000 Da) was 5 times more active than monomeric <b>Tn</b> (Table 3)                                                                                                                                                                                                                                                                                                                                                                                                                                                                          | <b>Tn</b> -glycopeptides from asialo ovine submandibular glycoprotein (M.W. <3,000 Da) was only 1.6 times more active than monomeric <b>Tn</b> (Table 2)                                                                                                                                                                                                                                                                                                                                                                                                                                                                                                                                                                             |
| 6 | Ratio of complex polyvalent glycotopes in macromolecules / monomeric <b>Tn</b>                                                                                                                                                                                                                                                                                                                                                                                                                                                                                                                                               | 3100 times more active than monomeric <b>Tn</b> (Table 2)                                                                                                                                                                                                                                                                                                                                                                                                                                                                                                                                                                  | 33 times more active than monomeric <b>Tn</b> (Table 3)                                                                                                                                                                                                                                                                                                                                                                                                                                                                                                                                                                                                                                                                              |
| 7 | Proposed shape of combining site <sup>§</sup>                                                                                                                                                                                                                                                                                                                                                                                                                                                                                                                                                                                | Small cavity type of GalNAc $\alpha$ 1- as major combining site with shallow groove as subsite                                                                                                                                                                                                                                                                                                                                                                                                                                                                                                                             | Shallow groove type                                                                                                                                                                                                                                                                                                                                                                                                                                                                                                                                                                                                                                                                                                                  |
| 8 | The most complementary size                                                                                                                                                                                                                                                                                                                                                                                                                                                                                                                                                                                                  | GalNAc $\alpha$ 1-Ser/Thr ( <b>Tn</b> )                                                                                                                                                                                                                                                                                                                                                                                                                                                                                                                                                                                    | One GalNAc $\alpha$ 1-Ser/Thr ( <b>Tn</b> ) to three to five sugars ( <b>A<sub>h</sub></b> or <b>A<sub>L</sub></b> and <b>Fp</b> )                                                                                                                                                                                                                                                                                                                                                                                                                                                                                                                                                                                                   |
| 9 | Biological Function                                                                                                                                                                                                                                                                                                                                                                                                                                                                                                                                                                                                          | Insecticidal property                                                                                                                                                                                                                                                                                                                                                                                                                                                                                                                                                                                                      | Unknown                                                                                                                                                                                                                                                                                                                                                                                                                                                                                                                                                                                                                                                                                                                              |

# Characterization no. ; \*SSL (*Salvia sclarea* lectin), [41]; ††From Table 3 of manuscript; †Based on *p*-nitrophenyl > the corresponding methyl glycosides as Yes; *p*-nitrophenyl < the corresponding methyl glycosides as No, in Table 3 of manuscript; §The proposed combining site, whether specific for terminal nonreducing ends of chains (cavity-type sites) or for internal sequences for sugar chains (groove-type sites) based on the criteria of reference [63].
